# Supplementary material for: Prognostic Impact of Nutritional Status on Overall Survival and Health-Related Quality of Life in Men with Advanced Prostate Cancer
Source: MDPI journal article supplement (doi:10.3390/nu15041044), 2023-02-20
Supplement: s1 [file s1]

**Table S1.** Association between baseline NS category and baseline HRQoL using the logistic regression model (validation of cutoff)

| Variable          | OR [95 % CI]         | p-value |
|-------------------|----------------------|---------|
| NR vs. WN         | 4.76 [1.79 – 4.76]   | < 0.01  |
| Sarcopenia vs. WN | 4.76 [2.33 -11.1]    | < 0.01  |
| Cachexia vs. WN   | 43.47 [5.34 – 333.3] | < 0.01  |

*Abbreviations: WN well-nourished patients, NR nutritional risk without criteria for sarcopenia/cachexia*

**Table S2.** Estimate of health related quality of life after six months according to best case/worst case scenario

| HRQoL after six months | Favorable HRQoL | Poor HRQoL |
|------------------------|-----------------|------------|
| Best case scenario     | 82              | 59         |
| Worst case scenario    | 60              | 81         |

*Abbreviations: HRQoL health-related quality of life*

**Table S3.** Patients` characteristics at baseline (n=141)

| Variable                  | Median | IQR         |
|---------------------------|--------|-------------|
| PG-SGA (points)           | 3      | 2-7         |
| BMI (kg/m <sup>2</sup> )  | 26.9   | 24.5-30     |
| FFMI (kg/m <sup>2</sup> ) | 18.5   | 17.28-20.03 |
| Handgrip strength (kg)    | 31     | 23-39       |
| ADT (months)              | 24.4   | 13.7-50     |
| Charlson index (score)    | 7      | 6-8         |
| Pain (VAS score)          | 2      | 0-4         |
| Age (years)               | 74.1   | 68.6-79.4   |
| Hb (g/l)                  | 131    | 117-142     |
| PSA (ng/ml)               | 103.6  | 38.8-194.3  |

*Abbreviations:* BMI, Body Mass Index; FFMI Fat-Free Mass Index, ADT duration of androgen deprivation therapy, VAS visual analog scale for pain assessment, Hb, Hemoglobin; PSA, Prostate-Specific Antigen; PG-SGA, Patient Generated-Subjective General Assessment

**Table S4.** Prognostic value of baseline NS for HRQoL at six months (best-case scenario)

| Variable                     | OR [95 % CI]        | p-value |
|------------------------------|---------------------|---------|
| NR vs. WN                    | 2.86 [0.92 to 9.09] | 0.07    |
| Sarcopenia vs. WN            | 0.85 [0.30 to 2.38] | 0.77    |
| Cachexia vs. WN              | 1.75 [0.37 to 8.33] | 0.48    |
| ADT (months)                 | 1.04 [0.99 to 1.11] | 0.11    |
| Comorbidities (score)        | 1.03 [0.81-1.28]    | 0.84    |
| Pain (VAS score)             | 1.28 [1.15 to 1.64] | <0.001  |
| Age (years)                  | 1.04 [0.98 to 1.11] | 0.96    |
| Visceral metastases (yes/no) | 1.59 [0.54 to 4.76] | 0.40    |
| Hemoglobin (g/l)             | 0.99 [0.97 to 1.02] | 0.76    |
| PSA (ng/ml)                  | 1 [0.998 to 1.02]   | 0.64    |

*Abbreviations: NR nutritional risk without criteria for sarcopenia/cachexia, WN well-nourished patients, ADT duration of androgen deprivation therapy, VAS visual analog scale for pain, PSA prostate-specific antigen*

**Table S5.** Overall survival in various NS categories

| NS category | Median OS (months) | 95 % CI for OS (months) |
|-------------|--------------------|-------------------------|
| WN          | 34                 | 23.63 to 44.37          |
| NR          | 19.32              | 6.53 to 32.11           |
| Sarcopenia  | 27.56              | 15.91 to 39.80          |
| Cachexia    | 6.57               | 0 to 14.2               |

*Abbreviations: NS nutritional status, NR nutritional risk without criteria for sarcopenia/cachexia, WN well-nourished patients*

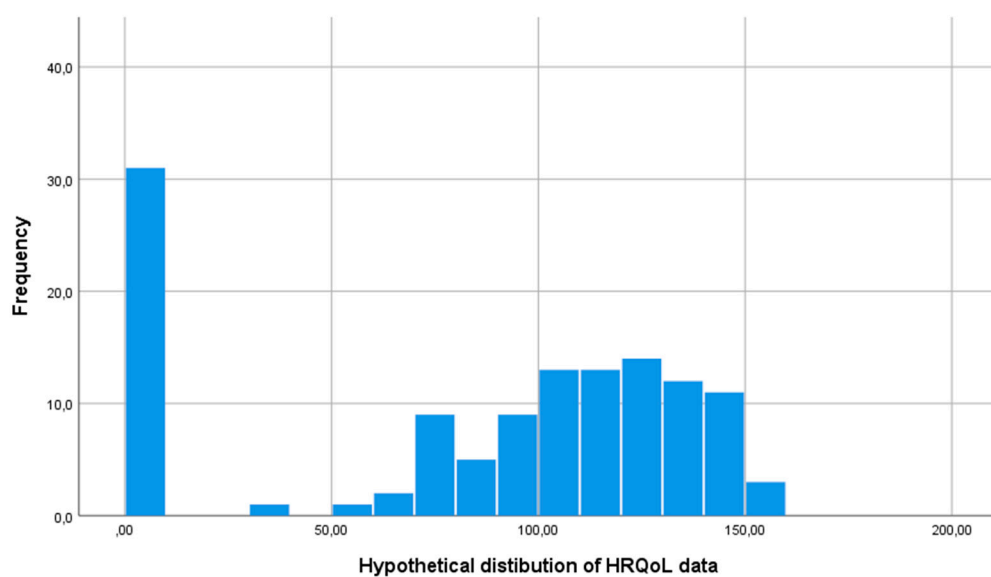

*Figure S1. Distribution of the FACT-P scores after six months. Missed patients for disease-related reasons have attributed a score of 0, and patients missed for unknown reasons were excluded*

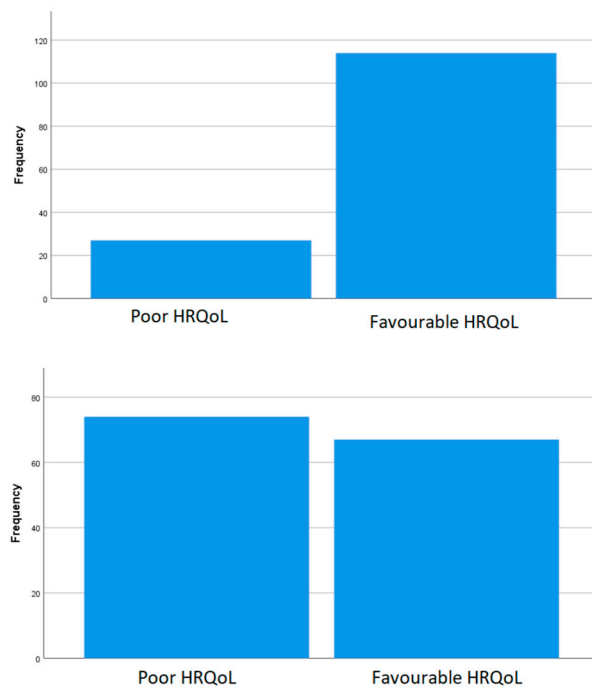

Figure S2. Distribution of HRQoL categories according to different cut-off values of the FACT-P scores; Upper chart: Testing for the cut-off at 50% (78 points); Lower chart: Testing for the cut-off at 75% (104 points)

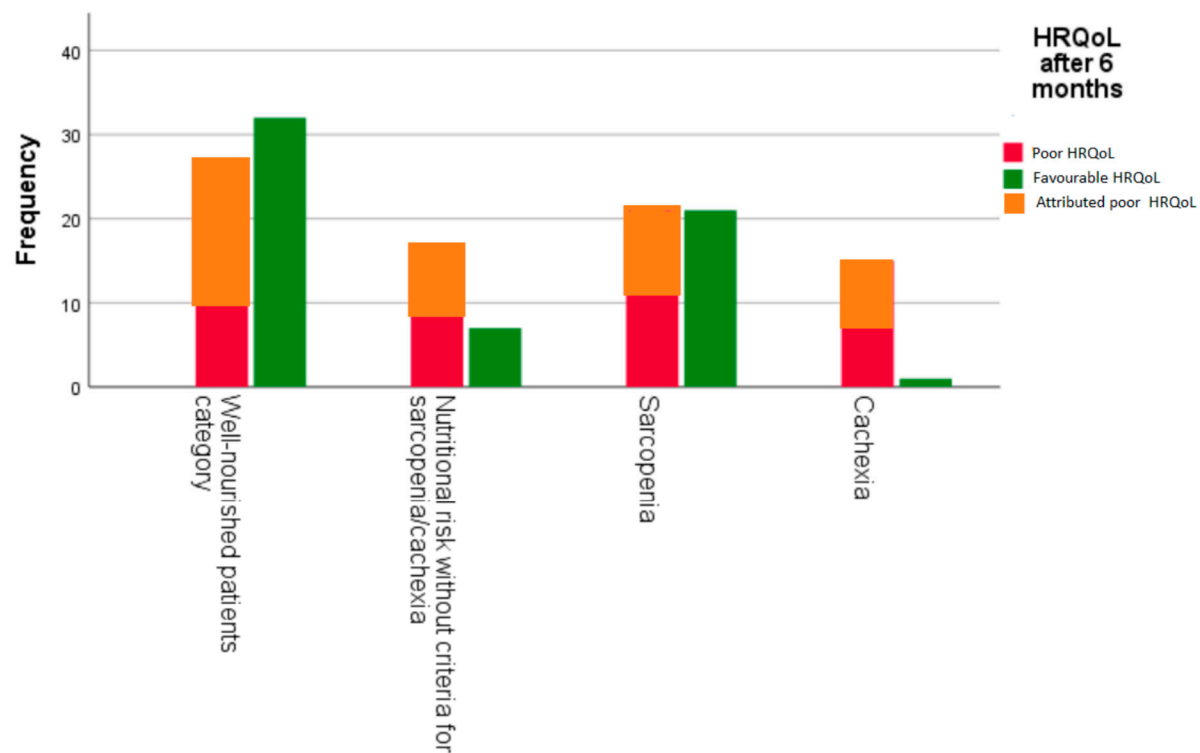

Figure S3. Distribution of the HRQoL categories at six months across nutritional categories according to the worst-case scenario
